# Supplementary material for: Optic nerve regeneration in larval zebrafish exhibits spontaneous capacity for retinotopic but not tectum specific axon targeting
Source: PLOS journal article supplement (doi:10.1371/journal.pone.0218667), 2019-06-20
Supplement: S1 (10.1371/journal.pone.0218667.s001) [file journal.pone.0218667.s001]

**Figure S1. RGC axonal growth during optic nerve regeneration.**

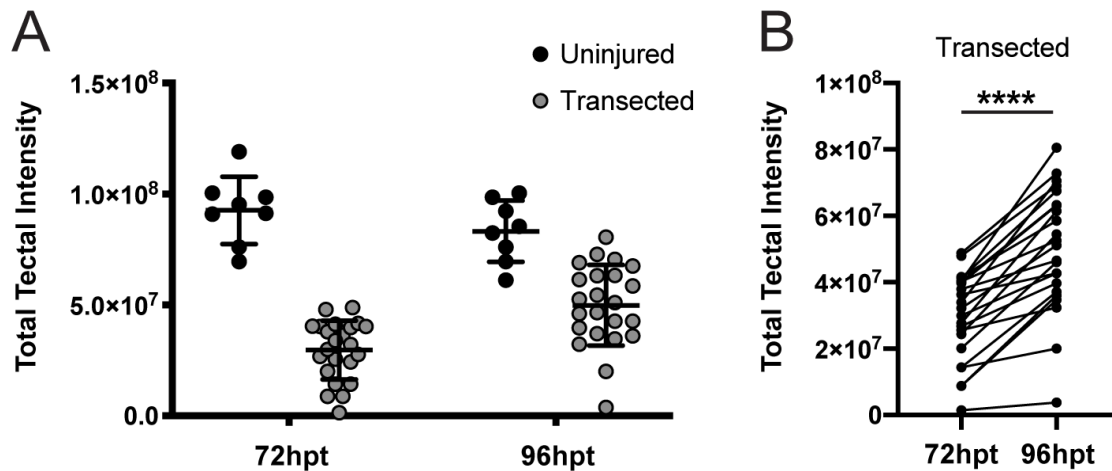

(A) The total intensity of the optic tecta of larvae that received optic nerve transections increases from 72 hpt to 96 hpt. Each data point represents a single larva and all error bars indicate  $\pm$ SEM. (B) Lines connect the points (from A) representing the total intensity of the optic tecta for each larva with optic nerve transections at 72 and 96hpt. \*\*\*\* $p < 0.0001$ , Student's t-test of mean total tectal intensity.
